# Supplementary material for: Designer drugs: mechanism of action and adverse effects
Source: Arch Toxicol. 2020 Apr 6;94(4):1085–133. doi: 10.1007/s00204-020-02693-7 (PMC7225206; doi:10.1007/s00204-020-02693-7)
Supplement: Supplementary file 1 — Supplementary file1 (XLSX 38 kb) [file 204_2020_2693_MOESM1_ESM.xlsx]

## Sheet: Fig. 1
Substance	Abbreviation	IUPAC name	DAT/SERT ratio	Source of pharmacological data
5-Methoxy-6-methyl-2-aminoindane	MMAI	5-methoxy-6-methyl-2,3-dihydro-1H-inden-2-amine	0.004	Luethi et al. 2018c
5-(2-Aminopropyl)-2,3-dihydrobenzofuran	5-APDB	1-(2,3-dihydro-1-benzofuran-5-yl)propan-2-amine	0.01	Rickli et al. 2015b
5-(2-Methylaminopropyl)-2,3-dihydrobenzofuran	5-MAPDB	1-(2,3-dihydro-1-benzofuran-5-yl)-N-methylpropan-2-amine	0.02	Rickli et al. 2015b
2,4-Dimethylmethcathinone	2,4-DMMC	1-(2,4-dimethylphenyl)-2-(methylamino)propan-1-one	0.02	Luethi et al. 2018c
4-Methylthioamphetamine	4-MTA	1-(4-methylsulfanylphenyl)propan-2-amine	0.02	Simmler et al. 2014a
para-Methoxyamphetamine/4-methoxyamphetamine	PMA	1-(4-methoxyphenyl)propan-2-amine	0.03	Simmler et al. 2014a
meta-Chlorophenylpiperazine	m-CPP	1-(3-chlorophenyl)piperazine	0.039	Simmler et al. 2014b
para-Methoxy-N-methylamphetamine	PMMA	1-(4-methoxyphenyl)-N-methylpropan-2-amine	0.04	Simmler et al. 2014a
5-(2-Aminopropyl)benzofuran	5-APB	1-(1-benzofuran-5-yl)propan-2-amine	0.05	Rickli et al. 2015b
6-(2-Aminopropyl)-2,3-dihydrobenzofuran	6-APDB	1-(2,3-dihydro-1-benzofuran-6-yl)propan-2-amine	0.07	Rickli et al. 2015b
3,4-Methyl​enedioxy​methamphetamine	MDMA	1-(1,3-benzodioxol-5-yl)-N-methylpropan-2-amine	0.08	Simmler et al. 2013
N-methyl-1,3-benzodioxolylbutanamine	MBDB	1-(1,3-benzodioxol-5-yl)-N-methylbutan-2-amine	0.09	Simmler et al. 2013
5-Iodo-2-aminoindane	5-IAI	5-iodo-2,3-dihydro-1H-inden-2-amine	0.11	Simmler et al. 2014b
3,4-Dimethylmethcathinone	3,4-DMMC	1-(3,4-dimethylphenyl)-2-(methylamino)propan-1-one	0.12	Luethi et al. 2018c
Methedrone/para-methoxymethcathinone		1-(4-methoxyphenyl)-2-(methylamino)propan-1-one	0.14	Simmler et al. 2014a
4-Ethylmethcathinone	4-EMC	1-(4-ethylphenyl)-2-(methylamino)propan-1-one	0.14	Rickli et al. 2015a
4-Chloroamphetamine/para-chloroamphetamine	4-CA/PCA	1-(4-chlorophenyl)propan-2-amine	0.14	Luethi et al. 2019b
3,4-Methylenedioxy-N-ethylamphetamine	MDEA	1-(1,3-benzodioxol-5-yl)-N-ethylpropan-2-amine	0.14	Simmler et al. 2013
4-Methylamphetamine	4-MA	1-(4-methylphenyl)propan-2-amine	0.15	Luethi et al. 2018c
5-(2-(Ethylaminopropyl)benzofuran	5-EAPB	1-(1-benzofuran-5-yl)-N-ethylpropan-2-amine	0.15	Rickli et al. 2015b
2,3-Dimethylmethcathinone	2,3-DMMC	1-(2,3-dimethylphenyl)-2-(methylamino)propan-1-one	0.16	Luethi et al. 2018c
3,4-Methylene​dioxy​amphetamine	MDA	1-(1,3-benzodioxol-5-yl)propan-2-amine	0.24	Rickli et al. 2015b
5,6-Methylenedioxy-2-aminoindane	MDAI	6,7-dihydro-5H-cyclopenta[f][1,3]benzodioxol-6-amine	0.27	Simmler et al. 2014b
6-(2-Aminopropyl)benzofuran	6-APB	1-(1-benzofuran-6-yl)propan-2-amine	0.29	Rickli et al. 2015b
Brephedrone/4-bromomethcathinone	4-BMC	1-(4-bromophenyl)-2-(methylamino)propan-1-one	0.4	Rickli et al. 2015a
4,4'-Dimethylaminorex	4,4'-DMAR	4-methyl-5-(4-methylphenyl)-4,5-dihydro-1,3-oxazol-2-amine	0.4	Rickli et al. 2019
Clephedrone/4-chloromethcathinone	4-CMC	1-(4-chlorophenyl)-2-(methylamino)propan-1-one	0.45	Luethi et al. 2019b
4-(2-Aminopropyl)benzofuran	4-APB	1-(1-benzofuran-4-yl)propan-2-amine	0.46	Rickli et al. 2015b
Mephedrone/4-methylmethcathinone	4-MMC	2-(methylamino)-1-(4-methylphenyl)propan-1-one	0.63	Luethi et al. 2018c
7-(2-Aminopropyl)benzofuran	7-APB	1-(1-benzofuran-7-yl)propan-2-amine	0.65	Rickli et al. 2015b
Ethylone/3,4-methylenedioxy-N-ethcathinone		1-(1,3-benzodioxol-5-yl)-2-(ethylamino)propan-1-one	0.8	Simmler et al. 2013
4-Fluoromethamphetamine	4-FMA	1-(4-fluorophenyl)-N-methylpropan-2-amine	1.1	Rickli et al. 2015a
Diclofensine		4-(3,4-dichlorophenyl)-7-methoxy-2-methyl-3,4-dihydro-1H-isoquinoline	1.1	Luethi et al. 2018a
3,4-Methylenedioxycathinone	β-Keto-MDA	2-amino-1-(1,3-benzodioxol-5-yl)propan-1-one	1.5	Rickli et al. 2015b
N-ethylamphetamine		N-ethyl-1-phenylpropan-2-amine	1.5	Simmler et al. 2014a
4-Methylethcathinone	4-MEC	2-(ethylamino)-1-(4-methylphenyl)propan-1-one	1.85	Simmler et al. 2014a
5-(2-Aminopropyl)indole	5-IT/5-API	1-(1H-indol-5-yl)propan-2-amine	1.9	Luethi et al. 2018c
Naphyrone		1-naphthalen-2-yl-2-pyrrolidin-1-ylpentan-1-one	2	Simmler et al. 2013
Butylone/β-keto-N-methylbenzodioxolylbutanamine		1-(1,3-benzodioxol-5-yl)-2-(methylamino)butan-1-one	2.1	Simmler et al. 2013
N-methyl-2-aminoindane	NM-2-AI	N-methyl-2,3-dihydro-1H-inden-2-amine	2.5	Luethi et al. 2018c
Cocaine		methyl (1R,2R,3S,5S)-3-benzoyloxy-8-methyl-8-azabicyclo[3.2.1]octane-2-carboxylate	3.1	Simmler et al. 2013
Methylone/3,4-methylenedioxy-N-methcathinone		1-(1,3-benzodioxol-5-yl)-2-(methylamino)propan-1-one	3.3	Simmler et al. 2013
1-Benzylpiperazine	BZP	1-benzylpiperazine	3.35	Simmler et al. 2014b
4-Fluoroamphetamine/para-fluoroamphetamine	4-FA/PFA	1-(4-fluorophenyl)propan-2-amine	3.6	Luethi et al. 2019b
3-Methylmethcathinone	3-MMC	2-(methylamino)-1-(3-methylphenyl)propan-1-one	3.7	Luethi et al. 2018c
Ethylnaphthidate	HDEP-28	ethyl (naphthalen-2-yl)(piperidin-2-yl)acetate	5	Luethi et al. 2018b
Flephedrone/4-fluoromethcathinone	4-FMC	1-(4-fluorophenyl)-2-(methylamino)propan-1-one	5.6	Luethi et al. 2019b
Pentylone/β-Keto-Methyl​benzo​dioxolyl​pentanamine		1-(1,3-benzodioxol-5-yl)-2-(methylamino)pentan-1-one	6.2	Simmler et al. 2014a
4-Methylaminorex	4-MAR	4-methyl-5-phenyl-4,5-dihydro-1,3-oxazol-2-amine	7.2	Rickli et al. 2019
Ethcathinone		2-(ethylamino)-1-phenylpropan-1-one	9.6	Simmler et al. 2014a
d-Methamphetamine		(2S)-N-methyl-1-phenylpropan-2-amine	17	Rickli et al. 2015a
Amphetamine		1-phenylpropan-2-amine	30	Luethi et al. 2019b
Methcathinone		2-(methylamino)-1-phenylpropan-1-one	34	Luethi et al. 2019b
N-benzyl-ethylphenidate	N-Bn-EPH	ethyl (1-benzylpiperidin-2-yl)(phenyl)acetate	42	Luethi et al. 2018b
Diphenylprolinol	D2PM	diphenyl(pyrrolidin-2-yl)methanol	44.36	Simmler et al. 2014b
Propylphenidate	PPH	propyl 2-phenyl-2-piperidin-2-ylacetate	70	Luethi et al. 2018b
3,4-Dichloroethylphenidate	3,4-DCEP	ethyl 2-(3,4-dichlorophenyl)-2-piperidin-2-ylacetate	100	Luethi et al. 2018b
3',4'-Methylenedioxy-α-pyrrolidinobutyrophenone	MDPBP	1-(1,3-benzodioxol-5-yl)-2-pyrrolidin-1-ylbutan-1-one	132	Rickli et al. 2015a
3',4'-Methylenedioxy-α-pyrrolidinopropiophenone	MDPPP	1-(1,3-benzodioxol-5-yl)-2-pyrrolidin-1-ylpropan-1-one	141	Rickli et al. 2015a
Methylmorphenate		methyl morpholin-3-yl(phenyl)acetate	141	Luethi et al. 2018b
Isopropylphenidate	IPH	propan-2-yl 2-phenyl-2-piperidin-2-ylacetate	179	Luethi et al. 2018b
3,4-Methylenedioxypyrovalerone	MDPV	1-(1,3-benzodioxol-5-yl)-2-pyrrolidin-1-ylpentan-1-one	192	Rickli et al. 2015a
3,4-Dichloromethylphenidate	3,4-DCMP	methyl 2-(3,4-dichlorophenyl)-2-piperidin-2-ylacetate	240	Luethi et al. 2018b
4-Fluoromethylphenidate	4F-MPH	methyl 2-(4-fluorophenyl)-2-piperidin-2-ylacetate	267	Luethi et al. 2018b
Pyrovalerone		1-(4-methylphenyl)-2-pyrrolidin-1-ylpentan-1-one	327	Rickli et al. 2015a
Ethylphenidate	EPH	ethyl 2-phenyl-2-piperidin-2-ylacetate	421	Luethi et al. 2018b
4-Methylmethylphenidate	4-Me-MPH	methyl 2-(4-methylphenyl)-2-piperidin-2-ylacetate	1093	Luethi et al. 2018b
Methylphenidate	MPH	methyl 2-phenyl-2-piperidin-2-ylacetate	2108	Luethi et al. 2018b

## Sheet: Fig. 2
Substance	Abbreviation	IUPAC name	Dose estimate	Source dose estimate	Source of pharmacological data
2-Diphenylmethylpiperidine	2-DPMP	2-benzhydrylpiperidine	4.5	Luethi and Liechti 2018	Simmler et al. 2014b
3,4-Dichloromethylphenidate	3,4-DCMP	methyl 2-(3,4-dichlorophenyl)-2-piperidin-2-ylacetate	5	Luethi and Liechti 2018	Luethi et al. 2018b
3,4-Methylenedioxypyrovalerone	MDPV	1-(1,3-benzodioxol-5-yl)-2-pyrrolidin-1-ylpentan-1-one	11.3333	Luethi and Liechti 2018	Rickli et al. 2015a
4-Fluoromethylphenidate	4F-MPH	methyl 2-(4-fluorophenyl)-2-piperidin-2-ylacetate	12.5	Luethi and Liechti 2018	Luethi et al. 2018b
Pentedrone/α-methylamino-valerophenone		2-(methylamino)-1-phenylpentan-1-one	12.5	Luethi and Liechti 2018	Simmler et al. 2014a
2-Aminoindane	2-AI	2,3-dihydro-1H-inden-2-amine	15	Luethi and Liechti 2018	Simmler et al. 2014b
Isopropylphenidate	IPH	propan-2-yl 2-phenyl-2-piperidin-2-ylacetate	16.25	Luethi and Liechti 2018	Luethi et al. 2018b
α-Pyrrolidinovalerophenone	α-PVP	1-phenyl-2-pyrrolidin-1-ylpentan-1-one	17.5	Luethi and Liechti 2018	Rickli et al. 2015a
Pyrovalerone		1-(4-methylphenyl)-2-pyrrolidin-1-ylpentan-1-one	20	Luethi and Liechti 2018	Rickli et al. 2015a
d-Methamphetamine		(2S)-N-methyl-1-phenylpropan-2-amine	20.8333	Luethi and Liechti 2018	Rickli et al. 2015b
(-)-Ephedrine		(1R,2S)-2-(methylamino)-1-phenylpropan-1-ol	23.75	Luethi and Liechti 2018	Rickli et al. 2015a
Diphenylprolinol	D2PM	diphenyl(pyrrolidin-2-yl)methanol	27.5	Luethi and Liechti 2018	Simmler et al. 2014b
Naphyrone		1-naphthalen-2-yl-2-pyrrolidin-1-ylpentan-1-one	27.5	Luethi and Liechti 2018	Rickli et al. 2015a
Pentylone/β-keto-kethyl​benzo​dioxolyl​pentanamine		1-(1,3-benzodioxol-5-yl)-2-(methylamino)pentan-1-one	30	Luethi and Liechti 2018	Simmler et al. 2014a
Buphedrone/α-methylamino-butyrophenone		2-(methylamino)-1-phenylbutan-1-one	40	Luethi and Liechti 2018	Simmler et al. 2014a
Ethylnaphthidate	HDEP-28	ethyl (naphthalen-2-yl)(piperidin-2-yl)acetate	40	Luethi and Liechti 2018	Luethi et al. 2018b
Methylphenidate	MPH	methyl 2-phenyl-2-piperidin-2-ylacetate	42.5	Luethi and Liechti 2018	Luethi et al. 2018b
Propylphenidate	PPH	propyl 2-phenyl-2-piperidin-2-ylacetate	42.5	Luethi and Liechti 2018	Luethi et al. 2018b
d-Amphetamine		(2S)-1-phenylpropan-2-amine	47.5	Luethi and Liechti 2018	Rickli et al. 2015a
4-Methylmethylphenidate	4-Me-MPH	methyl 2-(4-methylphenyl)-2-piperidin-2-ylacetate	50	Luethi and Liechti 2018	Luethi et al. 2018b
Cathinone		2-amino-1-phenylpropan-1-one	50	Luethi and Liechti 2018	Simmler et al. 2013
Diclofensine		4-(3,4-dichlorophenyl)-7-methoxy-2-methyl-3,4-dihydro-1H-isoquinoline	50	Luethi and Liechti 2018	Luethi et al. 2018a
para-Methoxyamphetamine/4-methoxyamphetamine	PMA	1-(4-methoxyphenyl)propan-2-amine	57.5	Luethi and Liechti 2018	Simmler et al. 2014a
Methcathinone		2-(methylamino)-1-phenylpropan-1-one	59	Luethi and Liechti 2018	Rickli et al. 2015a
Cocaine		methyl (1R,2R,3S,5S)-3-benzoyloxy-8-methyl-8-azabicyclo[3.2.1]octane-2-carboxylate	60	Luethi and Liechti 2018	Luethi et al. 2018b
Ethylphenidate	EPH	ethyl 2-phenyl-2-piperidin-2-ylacetate	60	Luethi and Liechti 2018	Luethi et al. 2018b
6-(2-Aminopropyl)-2,3-dihydrobenzofuran	6-APDB	1-(2,3-dihydro-1-benzofuran-6-yl)propan-2-amine	71.25	Luethi and Liechti 2018	Rickli et al. 2015b
3-Fluoromethcathinone	3-FMC	1-(3-fluorophenyl)-2-(methylamino)propan-1-one	75	Luethi and Liechti 2018	Simmler et al. 2014a
5-(2-Aminopropyl)indole	5-IT/5-API	1-(1H-indol-5-yl)propan-2-amine	75	Luethi and Liechti 2018	Luethi et al. 2018c
5-(2-Aminopropyl)benzofuran	5-APB	1-(1-benzofuran-5-yl)propan-2-amine	77.5	Luethi and Liechti 2018	Rickli et al. 2015b
5-(2-(Ethylaminopropyl)benzofuran	5-EAPB	1-(1-benzofuran-5-yl)-N-ethylpropan-2-amine	80	Luethi and Liechti 2018	Rickli et al. 2015b
4-Fluoromethamphetamine	4-FMA	1-(4-fluorophenyl)-N-methylpropan-2-amine	81.25	Luethi and Liechti 2018	Rickli et al. 2015a
1-Benzylpiperazine	BZP	1-benzylpiperazine	85	Luethi and Liechti 2018	Simmler et al. 2014b
meta-Chlorophenylpiperazine	m-CPP	1-(3-chlorophenyl)piperazine	85	Luethi and Liechti 2018	Simmler et al. 2014b
6-(2-Aminopropyl)benzofuran	6-APB	1-(1-benzofuran-6-yl)propan-2-amine	88.3333	Luethi and Liechti 2018	Rickli et al. 2015b
3,4-Methylene​dioxy​amphetamine	MDA	1-(1,3-benzodioxol-5-yl)propan-2-amine	90	Luethi and Liechti 2018	Rickli et al. 2015b
Butylone/β-keto-N-methylbenzodioxolylbutanamine		1-(1,3-benzodioxol-5-yl)-2-(methylamino)butan-1-one	93.75	Luethi and Liechti 2018	Simmler et al. 2013
4-Fluoroamphetamine/para-fluoroamphetamine	4-FA/PFA	1-(4-fluorophenyl)propan-2-amine	95	Luethi and Liechti 2018	Rickli et al. 2015a
5-(2-Methylaminopropyl)-2,3-dihydrobenzofuran	5-MAPDB	1-(2,3-dihydro-1-benzofuran-5-yl)-N-methylpropan-2-amine	97.5	Luethi and Liechti 2018	Rickli et al. 2015b
5-(2-Aminopropyl)-2,3-dihydrobenzofuran	5-APDB	1-(2,3-dihydro-1-benzofuran-5-yl)propan-2-amine	100	Luethi and Liechti 2018	Rickli et al. 2015b
3,4-Methyl​enedioxy​methamphetamine	MDMA	1-(1,3-benzodioxol-5-yl)-N-methylpropan-2-amine	105	Luethi and Liechti 2018	Rickli et al. 2015b
para-Methoxy-N-methylamphetamine	PMMA	1-(4-methoxyphenyl)-N-methylpropan-2-amine	110	Luethi and Liechti 2018	Simmler et al. 2014a
3-Methylmethcathinone	3-MMC	2-(methylamino)-1-(3-methylphenyl)propan-1-one	112.5	Luethi and Liechti 2018	Luethi et al. 2018c
N-methyl-2-aminoindane	NM-2-AI	N-methyl-2,3-dihydro-1H-inden-2-amine	125	Luethi and Liechti 2018	Luethi et al. 2018c
5,6-Methylenedioxy-2-aminoindane	MDAI	6,7-dihydro-5H-cyclopenta[f][1,3]benzodioxol-6-amine	133.333	Luethi and Liechti 2018	Simmler et al. 2014b
Flephedrone/4-fluoromethcathinone	4-FMC	1-(4-fluorophenyl)-2-(methylamino)propan-1-one	137.5	Luethi and Liechti 2018	Rickli et al. 2015a
3,4-Methylenedioxy-N-ethylamphetamine	MDEA	1-(1,3-benzodioxol-5-yl)-N-ethylpropan-2-amine	140	Luethi and Liechti 2018	Simmler et al. 2013
4-Methylethcathinone	4-MEC	2-(ethylamino)-1-(4-methylphenyl)propan-1-one	150	Luethi and Liechti 2018	Simmler et al. 2014a
Mephedrone/4-methylmethcathinone	4-MMC	2-(methylamino)-1-(4-methylphenyl)propan-1-one	150	Luethi and Liechti 2018	Luethi et al. 2018c
4-Ethylmethcathinone	4-EMC	1-(4-ethylphenyl)-2-(methylamino)propan-1-one	150	Luethi and Liechti 2018	Rickli et al. 2015a
Ethcathinone		2-(ethylamino)-1-phenylpropan-1-one	150.833	Luethi and Liechti 2018	Simmler et al. 2014a
Methylone/3,4-methylenedioxy-N-methcathinone		1-(1,3-benzodioxol-5-yl)-2-(methylamino)propan-1-one	187.5	Luethi and Liechti 2018	Simmler et al. 2013
N-methyl-1,3-benzodioxolylbutanamine	MBDB	1-(1,3-benzodioxol-5-yl)-N-methylbutan-2-amine	195	Luethi and Liechti 2018	Simmler et al. 2013
Ethylone/3,4-methylenedioxy-N-ethcathinone		1-(1,3-benzodioxol-5-yl)-2-(ethylamino)propan-1-one	206.25	Luethi and Liechti 2018	Simmler et al. 2013

## Sheet: Fig. 3
Substance		Abbreviation	IUPAC name
Amphetamines
	Amphetamine		1-phenylpropan-2-amine
	4-Fluoroamphetamine/para-fluoroamphetamine	4-FA/PFA	1-(4-fluorophenyl)propan-2-amine
	4-Chloroamphetamine/para-chloroamphetamine	4-CA/PCA	1-(4-chlorophenyl)propan-2-amine
	para-Methoxyamphetamine/4-methoxyamphetamine	PMA	1-(4-methoxyphenyl)propan-2-amine
	4-Methylthioamphetamine	4-MTA	1-(4-methylsulfanylphenyl)propan-2-amine
	Methamphetamine		N-methyl-1-phenylpropan-2-amine
	4-Fluoromethamphetamine	4-FMA	1-(4-fluorophenyl)-N-methylpropan-2-amine
	4-Chloromethamphetamine/para-Chloromethamphetamine	4-CMA	1-(4-chlorophenyl)-N-methylpropan-2-amine
	para-Methoxy-N-methylamphetamine	PMMA	1-(4-methoxyphenyl)-N-methylpropan-2-amine
	N-ethylamphetamine		N-ethyl-1-phenylpropan-2-amine
	3,4-Methyl​enedioxy​methamphetamine	MDMA	1-(1,3-benzodioxol-5-yl)-N-methylpropan-2-amine
	3,4-Methylene​dioxy​amphetamine	MDA	1-(1,3-benzodioxol-5-yl)propan-2-amine
	N-methyl-1,3-benzodioxolylbutanamine	MBDB	1-(1,3-benzodioxol-5-yl)-N-methylbutan-2-amine
	1,3-Benzodioxolylbutanamine	BDB	1-(1,3-benzodioxol-5-yl)butan-2-amine
	3,4-Methylenedioxy-N-ethylamphetamine	MDEA	1-(1,3-benzodioxol-5-yl)-N-ethylpropan-2-amine
Cathinone and pyrovalerone derivatives
	Cathinone		2-amino-1-phenylpropan-1-one
	Methcathinone		2-(methylamino)-1-phenylpropan-1-one
	Buphedrone/α-methylamino-butyrophenone		2-(methylamino)-1-phenylbutan-1-one
	Pentedrone/α-methylamino-valerophenone		2-(methylamino)-1-phenylpentan-1-one
	Ethcathinone		2-(ethylamino)-1-phenylpropan-1-one
	Mephedrone/4-methylmethcathinone	4-MMC	2-(methylamino)-1-(4-methylphenyl)propan-1-one
	4-Methylethcathinone	4-MEC	2-(ethylamino)-1-(4-methylphenyl)propan-1-one
	3-Methylmethcathinone	3-MMC	2-(methylamino)-1-(3-methylphenyl)propan-1-one
	3,4-Dimethylmethcathinone	3,4-DMMC	1-(3,4-dimethylphenyl)-2-(methylamino)propan-1-one
	Methedrone/para-methoxymethcathinone		1-(4-methoxyphenyl)-2-(methylamino)propan-1-one
	Flephedrone/4-fluoromethcathinone	4-FMC	1-(4-fluorophenyl)-2-(methylamino)propan-1-one
	3-Fluoromethcathinone	3-FMC	1-(3-fluorophenyl)-2-(methylamino)propan-1-one
	Clephedrone/4-chloromethcathinone	4-CMC	1-(4-chlorophenyl)-2-(methylamino)propan-1-one
	3-Chloromethcathinone	3-CMC	1-(3-chlorophenyl)-2-(methylamino)propan-1-one
	Brephedrone/4-bromomethcathinone	4-BMC	1-(4-bromophenyl)-2-(methylamino)propan-1-one
	Methylone/3,4-methylenedioxy-N-methcathinone		1-(1,3-benzodioxol-5-yl)-2-(methylamino)propan-1-one
	Ethylone/3,4-methylenedioxy-N-ethcathinone		1-(1,3-benzodioxol-5-yl)-2-(ethylamino)propan-1-one
	Butylone/β-keto-N-methylbenzodioxolylbutanamine		1-(1,3-benzodioxol-5-yl)-2-(methylamino)butan-1-one
	Pentylone/β-Keto-Methyl​benzo​dioxolyl​pentanamine		1-(1,3-benzodioxol-5-yl)-2-(methylamino)pentan-1-one
	Ephylone/β-keto-ethylbenzodioxolylpentanamine		1-(1,3-benzodioxol-5-yl)-2-(ethylamino)pentan-1-one
	α-Pyrrolidinopropiophenone	α-PPP	1-phenyl-2-pyrrolidin-1-ylpropan-1-one
	α-Pyrrolidinobutiophenone	α-PBP	1-phenyl-2-pyrrolidin-1-ylbutan-1-one
	α-Pyrrolidinovalerophenone	α-PVP	1-phenyl-2-pyrrolidin-1-ylpentan-1-one
	α-Pyrrolidinohexiophenone	α-PHP	1-phenyl-2-pyrrolidin-1-ylhexan-1-one
	α-Pyrrolidinopentiothiophenone	α-PVT	2-pyrrolidin-1-yl-1-thiophen-2-ylpentan-1-one
	3',4'-Methylenedioxy-α-pyrrolidinopropiophenone	MDPPP	1-(1,3-benzodioxol-5-yl)-2-pyrrolidin-1-ylpropan-1-one
	3',4'-Methylenedioxy-α-pyrrolidinobutyrophenone	MDPBP	1-(1,3-benzodioxol-5-yl)-2-pyrrolidin-1-ylbutan-1-one
	3,4-Methylenedioxypyrovalerone	MDPV	1-(1,3-benzodioxol-5-yl)-2-pyrrolidin-1-ylpentan-1-one
	Naphyrone		1-naphthalen-2-yl-2-pyrrolidin-1-ylpentan-1-one
	Pyrovalerone		1-(4-methylphenyl)-2-pyrrolidin-1-ylpentan-1-one

## Sheet: Fig. 4
Substance		Abbreviation	IUPAC name
Benzofuran and indole derivatives
	5-(2-Aminopropyl)benzofuran	5-APB	1-(1-benzofuran-5-yl)propan-2-amine
	5-(2-Aminopropyl)-2,3-dihydrobenzofuran	5-APDB	1-(2,3-dihydro-1-benzofuran-5-yl)propan-2-amine
	5-(2-Methylaminopropyl)-2,3-dihydrobenzofuran	5-MAPDB	1-(2,3-dihydro-1-benzofuran-5-yl)-N-methylpropan-2-amine
	5-(2-(Ethylaminopropyl)benzofuran	5-EAPB	1-(1-benzofuran-5-yl)-N-ethylpropan-2-amine
	5-(2-Aminopropyl)indole	5-IT/5-API	1-(1H-indol-5-yl)propan-2-amine
	6-(2-Aminopropyl)benzofuran	6-APB	1-(1-benzofuran-6-yl)propan-2-amine
	6-(2-Aminopropyl)-2,3-dihydrobenzofuran	6-APDB	1-(2,3-dihydro-1-benzofuran-6-yl)propan-2-amine
	6-(2-Methylaminopropyl)-2,3-dihydrobenzofuran	6-MAPDB	1-(2,3-dihydro-1-benzofuran-6-yl)-N-methylpropan-2-amine
	6-(2-(Ethylaminopropyl)benzofuran	6-EAPB	1-(1-benzofuran-6-yl)-N-ethylpropan-2-amine
	6-(2-Aminopropyl)indole	6-IT/6-API	1-(1H-indol-6-yl)propan-2-amine
Aminoindanes
	2-Aminoindane	2-AI	2,3-dihydro-1H-inden-2-amine
	N-methyl-2-aminoindane	NM-2-AI	N-methyl-2,3-dihydro-1H-inden-2-amine
	5-Methoxy-6-methyl-2-aminoindane	MMAI	5-methoxy-6-methyl-2,3-dihydro-1H-inden-2-amine
	5-Iodo-2-aminoindane	5-IAI	5-iodo-2,3-dihydro-1H-inden-2-amine
	5,6-Methylenedioxy-2-aminoindane	MDAI	6,7-dihydro-5H-cyclopenta[f][1,3]benzodioxol-6-amine
Piperazines
	meta-Chlorophenylpiperazine	m-CPP	1-(3-chlorophenyl)piperazine
	3-Trifluoromethylphenylpiperazine	TFMPP	1-[3-(trifluoromethyl)phenyl]piperazine
	para-Methoxyphenylpiperazine	MeOPP	1-(4-methoxyphenyl)piperazine
	1-Benzylpiperazine	BZP	1-benzylpiperazine
	1-(3,4-Methylenedioxybenzyl)piperazine	MDBZP	1-(1,3-benzodioxol-5-ylmethyl)piperazine
Phenidate derivatives
	Methylphenidate	MPH	methyl 2-phenyl-2-piperidin-2-ylacetate
	Ethylphenidate	EPH	ethyl 2-phenyl-2-piperidin-2-ylacetate
	Propylphenidate	PPH	propyl 2-phenyl-2-piperidin-2-ylacetate
	Isopropylphenidate	IPH	propan-2-yl 2-phenyl-2-piperidin-2-ylacetate
	4-Methylmethylphenidate	4-Me-MPH	methyl 2-(4-methylphenyl)-2-piperidin-2-ylacetate
	4-Fluoromethylphenidate	4F-MPH	methyl 2-(4-fluorophenyl)-2-piperidin-2-ylacetate
	3,4-Dichloromethylphenidate	3,4-DCMP	methyl 2-(3,4-dichlorophenyl)-2-piperidin-2-ylacetate
	3,4-Dichloroethylphenidate	3,4-DCEP	ethyl 2-(3,4-dichlorophenyl)-2-piperidin-2-ylacetate
	Methylnaphthidate	HDMP-28	methyl (naphthalen-2-yl)(piperidin-2-yl)acetate
	Ethylnaphthidate	HDEP-28	ethyl (naphthalen-2-yl)(piperidin-2-yl)acetate
Aminorex analogs
	Aminorex		5-phenyl-4,5-dihydro-1,3-oxazol-2-amine
	4-Methylaminorex	4-MAR	4-methyl-5-phenyl-4,5-dihydro-1,3-oxazol-2-amine
	4,4'-Dimethylaminorex	4,4'-DMAR	4-methyl-5-(4-methylphenyl)-4,5-dihydro-1,3-oxazol-2-amine
	3',4'-Methylenedioxy-4-methylaminorex	MDMAR	4-methyl-5-(3,4-methylenedioyphenyl)-4,5-dihydro-1,3-oxazol-2-amine
	3,4-Dimethylaminorex	3,4-DMAR	3,4-dimethyl-5-phenyl-1,3-oxazolidin-2-imine
Phenmetrazine derivatives
	Phenmetrazine		3-methyl-2-phenylmorpholine
	3-Fluorophenmetrazine	3-FPM	2-(3-fluorophenyl)-3-methylmorpholine
	4-Fluorophenmetrazine	4-FPM	2-(4-fluorophenyl)-3-methylmorpholine
	3-Methylphenmetrazine	3-MPM	3-methyl-2-(3-methylphenyl)morpholine
	4-Methylphenmetrazine	4-MPM	3-methyl-2-(4-methylphenyl)morpholine
Thiophene designer drugs
	Thiopropamine		1-thiophen-2-ylpropan-2-amine
	Methiopropamine	MPA	N-methyl-1-thiophen-2-ylpropan-2-amine

## Sheet: Fig. 5
Substance		Abbreviation	IUPAC name
Synthethic opioids
	Morphine		(4R,4aR,7S,7aR,12bS)-3-methyl-2,4,4a,7,7a,13-hexahydro-1H-4,12-methanobenzofuro[3,2-e]isoquinoline-7,9-diol
	U-47700		3,4-dichloro-N-[2-(dimethylamino)cyclohexyl]-N-methylbenzamide
	AH-7921		3,4-dichloro-N-[[1-(dimethylamino)cyclohexyl]methyl]benzamide
	MT-45		1-cyclohexyl-4-(1,2-diphenylethyl)piperazine
	Acetylfentanyl		N-phenyl-N-[1-(2-phenylethyl)piperidin-4-yl]acetamide
	Fentanyl		N-phenyl-N-[1-(2-phenylethyl)piperidin-4-yl]propanamide
	Butyrfentanyl		N-phenyl-N-[1-(2-phenylethyl)piperidin-4-yl]butanamide
	α-Methylfentanyl		N-phenyl-N-[1-(1-phenylpropan-2-yl)piperidin-4-yl]propanamide
	Furanylfentanyl		N-phenyl-N-[1-(2-phenylethyl)piperidin-4-yl]furan-2-carboxamide
	4-Methoxybutyrfentanyl	4-MeO-butyrfentanyl	N-(4-methoxyphenyl)-N-[1-(2-phenylethyl)piperidin-4-yl]butanamide
	Acrylfentanyl		N-phenyl-N-[1-(2-phenylethyl)piperidin-4-yl]prop-2-enamide
	Carfentanil		methyl 1-(2-phenylethyl)-4-(N-propanoylanilino)piperidine-4-carboxylate
Designer benzodiazepines
	Diazepam		7-chloro-1-methyl-5-phenyl-3H-1,4-benzodiazepin-2-one
	Flubromazepam		7-bromo-5-(2-fluorophenyl)-1,3-dihydro-1,4-benzodiazepin-2-one
	Phenazepam		7-bromo-5-(2-chlorophenyl)-1,3-dihydro-1,4-benzodiazepin-2-one
	Meclonazepam		(3S)-5-(2-chlorophenyl)-3-methyl-7-nitro-1,3-dihydro-1,4-benzodiazepin-2-one
	Pyrazolam		8-bromo-1-methyl-6-pyridin-2-yl-4H-[1,2,4]triazolo[4,3-a][1,4]benzodiazepine
	Clonazolam		6-(2-chlorophenyl)-1-methyl-8-nitro-4H-[1,2,4]triazolo[4,3-a][1,4]benzodiazepine
	Flubromazolam		8-bromo-6-(2-fluorophenyl)-1-methyl-4H-[1,2,4]triazolo[4,3-a][1,4]benzodiazepine
	Etizolam		7-(2-chlorophenyl)-4-ethyl-13-methyl-3-thia-1,8,11,12-tetrazatricyclo[8.3.0.02,6]trideca-2(6),4,7,10,12-pentaene
γ-Aminobutyric acid analogs
	γ-Butyrolactone	GBL	oxolan-2-one
	γ-Hydroxybutyric acid	GHB	4-hydroxybutanoic acid
	γ-Hydroxyvaleric acid	GHV	4-hydroxypentanoic acid
	Phenibut		4-amino-3-phenylbutanoic acid

## Sheet: Fig. 6
Substance		Abbreviation	IUPAC name
Arylcyclohexylamine and diarylethylamine designer drugs
	Phencyclidine	PCP	1-(1-phenylcyclohexyl)piperidine
	3-Methoxyphencyclidine	3-MeO-PCP	1-[1-(3-methoxyphenyl)cyclohexyl]piperidine
	4-Methoxyphencyclidine	4-MeO-PCP	1-[1-(4-methoxyphenyl)cyclohexyl]piperidine
	Ketamine		2-(2-chlorophenyl)-2-(methylamino)cyclohexan-1-one
	Methoxetamine	MXE	2-(ethylamino)-2-(3-methoxyphenyl)cyclohexan-1-one
	Methoxmetamine	MXM	2-(3-methoxyphenyl)-2-(methylamino)cyclohexan-1-one
	Diphenidine		1-(1,2-diphenylethyl)piperidine
	Methoxphenidine	MXP	1-[1-(2-methoxyphenyl)-2-phenylethyl]piperidine
	Ephenidine	EPE	N-ethyl-1,2-diphenylethanamine

## Sheet: Fig. 7
Substance		Abbreviation	IUPAC name
Synthetic cannabinoids
	Δ9-Tetrahydrocannabinol	Δ9-THC	(6aR,10aR)-6,6,9-trimethyl-3-pentyl-6a,7,8,10a-tetrahydrobenzo[c]chromen-1-ol
	HU-210		(6aR,10aR)-9-(hydroxymethyl)-6,6-dimethyl-3-(2-methyloctan-2-yl)-6a,7,10,10a-tetrahydrobenzo[c]chromen-1-ol
	CP 47,497		2-[(1S,3R)-3-hydroxycyclohexyl]-5-(2-methyl-2-octanyl)phenol
	JWH-007		(2-methyl-1-pentylindol-3-yl)-naphthalen-1-ylmethanone
	JWH-018		naphthalen-1-yl-(1-pentylindol-3-yl)methanone
	JWH-073		(1-butylindol-3-yl)-naphthalen-1-ylmethanone
	AM-1220		[1-[(1-methylpiperidin-2-yl)methyl]indol-3-yl]-naphthalen-1-ylmethanone
	AM-2201		(1-(5-Fluoropentyl)-1H-indol-3-yl)(naphthalen-1-yl)methanone
	MAM-2201		[1-(5-fluoropentyl)indol-3-yl]-(4-methylnaphthalen-1-yl)methanone
	PB-22		quinolin-8-yl 1-pentylindole-3-carboxylate
	5F-PB-22		quinolin-8-yl 1-(5-fluoropentyl)indole-3-carboxylate
	MDMB-CHMICA		methyl 2-[[1-(cyclohexylmethyl)indole-3-carbonyl]amino]-3,3-dimethylbutanoate
	MDMB-FUBICA		methyl 2-(1-(4-fluorobenzyl)-1H-indol-3-carboxamido)-3,3-dimethylbutanoate
	UR-144		(1-pentylindol-3-yl)-(2,2,3,3-tetramethylcyclopropyl)methanone
	XLR-11		[1-(5-fluoropentyl)indol-3-yl]-(2,2,3,3-tetramethylcyclopropyl)methanone
	ADB-FUBINACA		N-(1-amino-3,3-dimethyl-1-oxobutan-2-yl)-1-[(4-fluorophenyl)methyl]indazole-3-carboxamide
	ADB-PINACA		N-(1-amino-3,3-dimethyl-1-oxobutan-2-yl)-1-pentylindazole-3-carboxamide
	5F-ADB-PINACA		N-(1-amino-3,3-dimethyl-1-oxobutan-2-yl)-1-(5-fluoropentyl)indazole-3-carboxamide
	5F-ADB		methyl 2-[[1-(5-fluoropentyl)indazole-3-carbonyl]amino]-3,3-dimethylbutanoate
	AB-CHMINACA		N-(1-amino-3-methyl-1-oxobutan-2-yl)-1-(cyclohexylmethyl)indazole-3-carboxamide
	AB-FUBINACA		N-(1-amino-3-methyl-1-oxobutan-2-yl)-1-[(4-fluorophenyl)methyl]indazole-3-carboxamide
	AMB-CHMINACA		methyl 2-[[1-(cyclohexylmethyl)indazole-3-carbonyl]amino]-3-methylbutanoate
	AMB-FUBINACA		methyl 2-[[1-[(4-fluorophenyl)methyl]indazole-3-carbonyl]amino]-3-methylbutanoate

## Sheet: Fig. 8
Substance	Abbreviation	IUPAC name	Dose estimate	Source dose estimate	Source of pharmacological data
Lysergic acid diethylamide	LSD	(6aR,9R)-N,N-diethyl-7-methyl-6,6a,8,9-tetrahydro-4H-indolo[4,3-fg]quinoline-9-carboxamide	0.116875	Luethi and Liechti 2018	Rickli et al. 2015c
4-Ethyl-2,5-dimethoxy-N-(2-methoxybenzyl)phenethylamine	25E-NBOMe	2-(4-ethyl-2,5-dimethoxyphenyl)-N-[(2-methoxyphenyl)methyl]ethanamine	0.3	Luethi and Liechti 2018	Rickli et al. 2015c
4-Bromo-2,5-dimethoxy-N-(2-methoxybenzyl)phenethylamine	25B-NBOMe	2-(4-bromo-2,5-dimethoxyphenyl)-N-[(2-methoxyphenyl)methyl]ethanamine	0.4125	Luethi and Liechti 2018	Rickli et al. 2015c
4-Ethylthio-2,5-dimethoxy-N-(2-methoxybenzyl)phenethylamine	25T2-NBOMe	2-(4-ethylsulfanyl-2,5-dimethoxyphenyl)-N-[(2-methoxyphenyl)methyl]ethanamine	0.45	Luethi and Liechti 2018	Rickli et al. 2015c
4-Chloro-2,5-dimethoxy-N-(2-methoxybenzyl)phenethylamine	25C-NBOMe	2-(4-chloro-2,5-dimethoxyphenyl)-N-[(2-methoxyphenyl)methyl]ethanamine	0.458333	Luethi and Liechti 2018	Rickli et al. 2015c
4-Isopropylthio-2,5-dimethoxy-N-(2-methoxybenzyl)phenethylamine	25T4-NBOMe	2-(2,5-dimethoxy-4-propan-2-ylsulfanylphenyl)-N-[(2-methoxyphenyl)methyl]ethanamine	0.525	Luethi and Liechti 2018	Rickli et al. 2015c
4-Nitrophenyl-2,5-dimethoxy-N-(2-methoxybenzyl)phenethylamine	25N-NBOMe	2-(2,5-dimethoxy-4-nitrophenyl)-N-[(2-methoxyphenyl)methyl]ethanamine	0.55	Luethi and Liechti 2018	Rickli et al. 2015c
4-Propyl-2,5-dimethoxy-N-(2-methoxybenzyl)phenethylamine	25P-NBOMe	2-(2,5-dimethoxy-4-propylphenyl)-N-[(2-methoxyphenyl)methyl]ethanamine	0.575	Luethi and Liechti 2018	Rickli et al. 2015c
4-Iodo-2,5-dimethoxy-N-(2-methoxybenzyl)phenethylamine	25I-NBOMe	2-(4-iodo-2,5-dimethoxyphenyl)-N-[(2-methoxyphenyl)methyl]ethanamine	0.625	Luethi and Liechti 2018	Rickli et al. 2015c
4-Methyl-2,5-dimethoxy-N-(2-methoxybenzyl)phenethylamine	25D-NBOMe	2-(2,5-dimethoxy-4-methylphenyl)-N-[(2-methoxyphenyl)methyl]ethanamine	0.95	Luethi and Liechti 2018	Rickli et al. 2015c
5-Methoxy-α-methyltryptamine	5-MeO-αMT	1-(5-methoxy-1H-indol-3-yl)propan-2-amine	3.5	Luethi and Liechti 2018	Rickli et al. 2016
5-Methoxy-N-methyl-N-isopropyltryptamine	5-MeO-MiPT	N-[2-(5-methoxy-1H-indol-3-yl)ethyl]-N-methylpropan-2-amine	5.25	Luethi and Liechti 2018	Rickli et al. 2016
4-Propyl-2,5-dimethoxyphenethylamine	2C-P	2-(2,5-dimethoxy-4-propylphenyl)ethanamine	7.25	Luethi and Liechti 2018	Rickli et al. 2015c
4-Isopropylthio-2,5-dimethoxyphenethylamine	2C-T-4	2-(2,5-dimethoxy-4-propan-2-ylsulfanylphenyl)ethanamine	13.25	Luethi and Liechti 2018	Luethi et al. 2018d
4-Ethyl-2,5-dimethoxyphenethylamine	2C-E	2-(2,5-dimethoxy-4-ethylphenyl)ethanamine	13.75	Luethi and Liechti 2018	Rickli et al. 2015c
2C-B-FLY		2-(4-bromo-2,3,6,7-tetrahydrofuro[2,3-f][1]benzofuran-8-yl)ethanamine	14	Luethi and Liechti 2018	Rickli et al. 2015c
4-(3-Fluoropropylthio)-2,5-dimethoxyphenethylamine	2C-T-28	2-(4-[3-fluoropropylsulfanyl]-2,5-dimethoxyphenyl)ethanamine	14	Luethi and Liechti 2018	Luethi et al. 2018d
4-Hydroxy-N-methyl-N-ethyltryptamine	4-HO-MET	3-[2-[ethyl(methyl)amino]ethyl]-1H-indol-4-ol	14.75	Luethi and Liechti 2018	Rickli et al. 2016
4-Hydroxy-N,N-diisopropyltryptamine	4-HO-DiPT	3-[2-[di(propan-2-yl)amino]ethyl]-1H-indol-4-ol	15.625	Luethi and Liechti 2018	Rickli et al. 2016
Psilocin		3-[2-(dimethylamino)ethyl]-1H-indol-4-ol	15.8333	Luethi and Liechti 2018	Rickli et al. 2016
4-Iodo-2,5-dimethoxyphenethylamine	2C-I	2-(4-iodo-2,5-dimethoxyphenyl)ethanamine	17	Luethi and Liechti 2018	Rickli et al. 2015c
4-Ethylthio-2,5-dimethoxyphenethylamine	2C-T-2	2-(2,5-dimethoxy-4-ethylsulfanylphenyl)ethanamine	17.375	Luethi and Liechti 2018	Rickli et al. 2015c
4-Allylthio-2,5-dimethoxyphenethylamine	2C-T-16	2-(2,5-dimethoxy-4-prop-2-enylsulfanylphenyl)ethanamine	17.5	Luethi and Liechti 2018	Luethi et al. 2018d
4-(2,2-Difluouroethylthio)-2,5-dimethoxyphenethylamine	2C-T-21.5	2-(4-[(2,2-difluoroethylsulfanyl]-2,5-dimethoxyphenyl)ethanamine	21	Luethi and Liechti 2018	Luethi et al. 2018d
4-Propylthio-2,5-dimethoxyphenethylamine	2C-T-7	2-(2,5-dimethoxy-4-propylsulfanylphenyl)ethanamine	21.25	Luethi and Liechti 2018	Luethi et al. 2018d
4-Bromo-2,5-dimethoxyphenethylamine	2C-B	2-(4-bromo-2,5-dimethoxyphenyl)ethanamine	22	Luethi and Liechti 2018	Rickli et al. 2015c
4-Methallylthio-2,5-dimethoxyphenethylamine	2C-T-3	2-(2,5-dimethoxy-4-[2-methylprop-2-enylsulfanyl]phenyl)ethanamine	27.5	Luethi and Liechti 2018	Luethi et al. 2018d
4-Chloro-2,5-dimethoxyphenethylamine	2C-C	2-(4-chloro-2,5-dimethoxyphenyl)ethanamine	30	Luethi and Liechti 2018	Rickli et al. 2015c
4-Methyl-2,5-dimethoxyphenethylamine	2C-D	2-(2,5-dimethoxy-4-methylphenyl)ethanamine	36.875	Luethi and Liechti 2018	Rickli et al. 2015c
N,N-dimethyltryptamine	DMT	N,N-dimethyl-2-(1H-indol-3-yl)ethanamine	40	Luethi and Liechti 2018	Rickli et al. 2016
N,N-diisopropyltryptamine	DiPT	N-[2-(1H-indol-3-yl)ethyl]-N-propan-2-ylpropan-2-amine	51.875	Luethi and Liechti 2018	Rickli et al. 2016
4-Methylthio-2,5-dimethoxyphenethylamine	2C-T-1	2-(2,5-dimethoxy-4-methylsulfanylphenyl)ethanamine	77.5	Luethi and Liechti 2018	Luethi et al. 2018d
4-Benzylthio-2,5-dimethoxyphenethylamine	2C-T-27	2-[4-(benzylsulfanyl)-2,5-dimethoxyphenyl]ethanamine	105	Luethi and Liechti 2018	Luethi et al. 2018d
4-Nitro-2,5-dimethoxyphenethylamine	2C-N	2-(2,5-dimethoxy-4-nitrophenyl)ethanamine	118.75	Luethi and Liechti 2018	Rickli et al. 2015c
Mescaline		2-(3,4,5-trimethoxyphenyl)ethanamine	266.75	Luethi and Liechti 2018	Rickli et al. 2015c

## Sheet: Fig. 9
Substance		Abbreviation	IUPAC name
Phenethylamines
	Mescaline		2-(3,4,5-trimethoxyphenyl)ethanamine
	4-Chloro-2,5-dimethoxyphenethylamine	2C-C	2-(4-chloro-2,5-dimethoxyphenyl)ethanamine
	4-Bromo-2,5-dimethoxyphenethylamine	2C-B	2-(4-bromo-2,5-dimethoxyphenyl)ethanamine
	4-Iodo-2,5-dimethoxyphenethylamine	2C-I	2-(4-iodo-2,5-dimethoxyphenyl)ethanamine
	β-Keto-4-bromo-2,5-dimethoxyphenethylamine	βk-2C-B	2-amino-1-(4-bromo-2,5-dimethoxyphenyl)ethanone
	4-Methyl-2,5-dimethoxyphenethylamine	2C-D	2-(2,5-dimethoxy-4-methylphenyl)ethanamine
	4-Ethyl-2,5-dimethoxyphenethylamine	2C-E	2-(2,5-dimethoxy-4-ethylphenyl)ethanamine
	4-Propyl-2,5-dimethoxyphenethylamine	2C-P	2-(2,5-dimethoxy-4-propylphenyl)ethanamine
	4-Ethylthio-2,5-dimethoxyphenethylamine	2C-T-2	2-(2,5-dimethoxy-4-ethylsulfanylphenyl)ethanamine
	4-Propylthio-2,5-dimethoxyphenethylamine	2C-T-7	2-(2,5-dimethoxy-4-propylsulfanylphenyl)ethanamine
	4-Chloro-2,5-dimethoxyamphetamine	DOC	1-(4-chloro-2,5-dimethoxyphenyl)propan-2-amine
	4-Bromo-2,5-dimethoxyamphetamine	DOB	1-(4-bromo-2,5-dimethoxyphenyl)propan-2-amine
	4-Iodo-2,5-dimethoxyamphetamine	DOI	1-(4-iodo-2,5-dimethoxyphenyl)propan-2-amine
	4-Methyl-2,5-dimethoxyamphetamine	DOM	1-(2,5-dimethoxy-4-methylphenyl)propan-2-amine
	2,4,5-Trimethoxyamphetamine	TMA-2	1-(2,4,5-trimethoxyphenyl)propan-2-amine
	4-Bromo-2,5-dimethoxy-N-(2-methoxybenzyl)phenethylamine	25B-NBOMe	2-(4-bromo-2,5-dimethoxyphenyl)-N-[(2-methoxyphenyl)methyl]ethanamine
	4-Iodo-2,5-dimethoxy-N-(2-methoxybenzyl)phenethylamine	25I-NBOMe	2-(4-iodo-2,5-dimethoxyphenyl)-N-[(2-methoxyphenyl)methyl]ethanamine
	4-Chloro-2,5-dimethoxy-N-(2-methoxybenzyl)phenethylamine	25C-NBOMe	2-(4-chloro-2,5-dimethoxyphenyl)-N-[(2-methoxyphenyl)methyl]ethanamine
	4-Methyl-2,5-dimethoxy-N-(2-methoxybenzyl)phenethylamine	25D-NBOMe	2-(2,5-dimethoxy-4-methylphenyl)-N-[(2-methoxyphenyl)methyl]ethanamine
	2C-B-FLY		2-(4-bromo-2,3,6,7-tetrahydrofuro[2,3-f][1]benzofuran-8-yl)ethanamine
	2C-B-dragonFLY		2-(8-bromobenzo[1,2-b:4,5-b′]difuran-4-yl)ethan-1-amine
	DOB-FLY		1-(4-bromo-2,3,6,7-tetrahydrofuro[2,3-f][1]benzofuran-8-yl)propan-2-amine
	Bromo-dragonFLY		1-(4-bromofuro[2,3-f][1]benzofuran-8-yl)propan-2-amine
Tryptamines
	Psilocin		3-[2-(dimethylamino)ethyl]-1H-indol-4-ol
	N,N-dimethyltryptamine	DMT	N,N-dimethyl-2-(1H-indol-3-yl)ethanamine
	N,N-diethyltryptamine	DET	N,N-diethyl-2-(1H-indol-3-yl)ethanamine
	N,N-dimethyl-5-methoxytryptamine	5-MeO-DMT	2-(5-methoxy-1H-indol-3-yl)-N,N-dimethylethanamine
	5-Methoxy-α-methyltryptamine	5-MeO-αMT	1-(5-methoxy-1H-indol-3-yl)propan-2-amine
	N,N-diisopropyltryptamine	DiPT	N-[2-(1H-indol-3-yl)ethyl]-N-propan-2-ylpropan-2-amine
	4-Hydroxy-N,N-diisopropyltryptamine	4-HO-DiPT	3-[2-[di(propan-2-yl)amino]ethyl]-1H-indol-4-ol
	5-Methoxy-N,N-diisopropyltryptamine	5-MeO-DiPT	N-[2-(5-methoxy-1H-indol-3-yl)ethyl]-N-propan-2-ylpropan-2-amine
	N-methyl-N-isopropyltryptamine	MiPT	N-[2-(1H-indol-3-yl)ethyl]-N-methylpropan-2-amine
	5-Methoxy-N-methyl-N-isopropyltryptamine	5-MeO-MiPT	N-[2-(5-methoxy-1H-indol-3-yl)ethyl]-N-methylpropan-2-amine
Lysergamides
	Lysergic acid diethylamide	LSD	(6aR,9R)-N,N-diethyl-7-methyl-6,6a,8,9-tetrahydro-4H-indolo[4,3-fg]quinoline-9-carboxamide
	1-Acetyl-lysergic acid diethylamide	ALD-52	(6aR,9R)-4-acetyl-N,N-diethyl-7-methyl-6,6a,8,9-tetrahydroindolo[4,3-fg]quinoline-9-carboxamide
	1-Propionyl-lysergic acid diethylamide	1P-LSD	(6aR,9R)-N,N-diethyl-7-methyl-4-propanoyl-6,6a,8,9-tetrahydroindolo[4,3-fg]quinoline-9-carboxamide
	6-Ethyl-6-nor-lysergic acid diethylamide	ETH-LAD	(6aR,9R)-N,N,7-triethyl-6,6a,8,9-tetrahydro-4H-indolo[4,3-fg]quinoline-9-carboxamide
	Lysergic acid 2,4-dimethylazetidide	LSZ	[(6aR,9R)-7-methyl-6,6a,8,9-tetrahydro-4H-indolo[4,3-fg]quinolin-9-yl]-[(2S,4S)-2,4-dimethylazetidin-1-yl]methanone
